# Supplementary material
Source: bioRxiv or medRxiv preprint supplement (https://medrxiv.org/content/medrxiv/early/2024/08/06/2024.08.05.24311494/DC1/embed/media-1.pdf)
Supplement: Supplementary file [file media-1.pdf]

**Supplementary File S1.**

**Social isolation in mid-life: associations with psychological distress, life satisfaction and self-rated health in two successive British birth cohorts**

Rosie Mansfield <sup>a\*</sup> Marcus Richards <sup>b</sup>, George B. Ploubidis <sup>a</sup>, Morag Henderson <sup>a+</sup>, Praveetha Patalay <sup>a, b+</sup>

<sup>a</sup>Centre for Longitudinal Studies, University College London

<sup>b</sup>MRC Unit for Lifelong Health and Ageing, University College London

\*Corresponding author: Dr Rosie Mansfield, [r.mansfield@ucl.ac.uk](mailto:r.mansfield@ucl.ac.uk)

+Shared senior authors

## Table of Contents

|                                                                                                                                                                                                                                                                                                                                                                                                                                     |    |
|-------------------------------------------------------------------------------------------------------------------------------------------------------------------------------------------------------------------------------------------------------------------------------------------------------------------------------------------------------------------------------------------------------------------------------------|----|
| Table S1. <i>Descriptive statistics for demographic, socioeconomic and health covariates, social isolation indicators and health outcomes using complete case data</i> .....                                                                                                                                                                                                                                                        | 4  |
| Table S2. <i>Descriptive statistics for demographic, socioeconomic and health covariates using multiply imputed data m=50 (1970 BCS N = 16,585 and 1958 NCDS = 15,806)</i> .....                                                                                                                                                                                                                                                    | 6  |
| Table S3. <i>Harmonisation of demographic, socioeconomic and health covariates, social isolation indicators and health outcomes</i> .....                                                                                                                                                                                                                                                                                           | 7  |
| Table S4. <i>N(%) of missing cases for covariates, social isolation indicators and health outcomes (Full sample N = 32,391, 1970 BCS N = 16,585, 1958 NCDS N = 15,806)</i> .....                                                                                                                                                                                                                                                    | 17 |
| Table S5. <i>Linear multivariable regression models for each separate social isolation indicator to identify (1) independent effects of each social isolation indicator and (2) cohort effects in these independent effects on psychological distress, life satisfaction and self-rated general health using multiply imputed data m=50 (Full sample N = 32,391, Males N = 15,810, Females N = 15,221)</i> .....                    | 19 |
| Table S6. <i>Linear multivariable regression models for each separate social isolation indicator to identify (1) independent effects of each social isolation indicator and (2) cohort effects in these independent effects on psychological distress, life satisfaction and self-rated general health – complete case</i> .....                                                                                                    | 21 |
| Table S7. <i>Linear multivariable regression models for each separate social isolation indicator to identify (1) independent effects of each social isolation indicator and (2) cohort effects in these independent effects on psychological distress, life satisfaction and self-rated general health using impute and delete data</i> .....                                                                                       | 23 |
| Figure S1 (a, b, c and d). <i>Model predicted marginal mean plots for significant (<math>p &lt; .10</math>) social isolation by cohort interactions on health outcomes</i> .....                                                                                                                                                                                                                                                    | 25 |
| Figure S2. <i>Model predicted marginal mean plot for cumulative social isolation score by cohort interaction on self-rated general health</i> .....                                                                                                                                                                                                                                                                                 | 26 |
| Table S8. <i>Linear multivariable regression models for the cumulative social isolation score to identify 1) ‘dose response’ effects using the cumulative social isolation score, and 2) cohort effects in any ‘dose-response’ associations on psychological distress, life satisfaction and self-rated general health – complete case and impute and delete models</i> .....                                                       | 27 |
| Table S9. <i>Linear multivariable regression models for the interaction between multiple social isolation indicators to identify 1) the additive and multiplicative interaction effects, and 2) cohort effects in any interaction associations on psychological distress, life satisfaction and self-rated general health using multiply imputed data m=50 (Full sample N = 32,391, Males N = 15,810, Females N = 15,221)</i> ..... | 29 |
| Table S10. <i>Linear multivariable regression models for the interaction between multiple social isolation indicators to identify 1) the additive and multiplicative interaction effects, and 2) cohort effects in any interaction associations on psychological distress, life satisfaction and self-rated general health using complete case data</i> .....                                                                       | 31 |
| Table S11. <i>Linear multivariable regression models for the interaction between multiple social isolation indicators to identify 1) the additive and multiplicative interaction effects,</i>                                                                                                                                                                                                                                       |    |

*and 2) cohort effects in any interaction associations on psychological distress, life satisfaction and self-rated general health using impute and delete data .....34*

*Table S13. Class membership (N(%)) for full sample and by sex and cohort.....36*

Table S1. *Descriptive statistics for demographic, socioeconomic and health covariates, social isolation indicators and health outcomes using complete case data*

| Variable                                                                             | 1970 BCS |                        |              | 1958 NCDS |           |               |
|--------------------------------------------------------------------------------------|----------|------------------------|--------------|-----------|-----------|---------------|
|                                                                                      | N        | Age(year)              | %            | N         | Age(year) | %             |
| <i>Demographic, Socioeconomic and Health Covariates</i>                              |          |                        |              |           |           |               |
| Sex (if female)                                                                      | 15,226   | Birth                  | 7,457(48.98) | 15,805    | Birth     | 7,764(49.12)  |
| Self-reported sex (if female)                                                        | 8,804    | 38 (2008)              | 4,638(52.68) | 11,213    | 42 (1999) | 5,712(50.94)  |
| Education – highest qualification - educated to degree level (if no degree)          | 8,764    | 38 (2008)              | 8,418(96.05) | 15,805    | 42 (1999) | 15,325(96.96) |
| Socioeconomic status – self-reported financial difficulties (if yes)                 | 8,773    | 38 (2008)              | 797(9.08)    | 11,174    | 42 (1999) | 896(8.02)     |
| Socioeconomic status – occupational social class                                     | 7,423    | 38 (2008)              |              | 9,487     | 42 (1999) |               |
| Professional/Managerial-technical                                                    |          |                        | 3,739(50.37) |           |           | 4,059(42.78)  |
| Intermediate                                                                         |          |                        | 2,771(37.33) |           |           | 3,937(41.50)  |
| Partly skilled/Unskilled                                                             |          |                        | 881(11.87)   |           |           | 1,471(15.51)  |
| Others                                                                               |          |                        | 32(0.43)     |           |           | 20(0.21)      |
| Socioeconomic status – homeownership (if no)                                         | 8,757    | 38 (2008)              | 1,922(21.95) | 11,131    | 42 (1999) | 2,091(18.79)  |
| Health – self-rated general health (Mean (SE))                                       | 8,770    | 38 (2008)              | 3.73(1.01)   | 11,171    | 42 (1999) | 3.09(0.76)    |
| Health – limiting long standing illness (if yes)                                     | 8,803    | 38 (2008)              | 1,394(15.84) | 11,171    | 42 (1999) | 3,234(28.95)  |
| Health – psychological distress (Mean (SE))                                          | 9,445    | 34 (2004)              | 1.67(1.90)   | 11,076    | 42 (1999) | 1.51(1.78)    |
| Health – life satisfaction (Mean (SE))                                               | 9,441    | 34 (2004)              | 7.41(1.80)   | 11,069    | 42 (1999) | 7.30(1.91)    |
| <i>Social Isolation Indicators</i>                                                   |          |                        |              |           |           |               |
| Living alone (if yes)                                                                | 9,802    | 42 (2012)              | 949(9.68)    | 9,432     | 46 (2004) | 870(9.22)     |
| Lack of regular contact with friends and relatives outside of the household (if yes) | 9,749    | 42 (2012)              | 345(3.54)    | 8,482     | 44 (2002) | 79(0.93)      |
| Out of education and employment (if yes)                                             | 9,767    | 42 (2012)              | 1,400(14.33) | 9,448     | 46 (2004) | 1,164(12.32)  |
| Lack of community engagement (if yes)                                                | 6,512    | 42 (2012)<br>46 (2016) | 4,869(74.77) | 9,441     | 46 (2004) | 7,259(76.89)  |

|                                                     |       |           |              |       |           |              |
|-----------------------------------------------------|-------|-----------|--------------|-------|-----------|--------------|
| Total social isolation score (0-3)*                 | 6,497 | 42 (2012) |              | 7,816 | 46 (2004) |              |
| 0                                                   |       |           | 1,307(20.12) |       |           | 1,546(19.78) |
| 1                                                   |       |           | 4,062(62.52) |       |           | 5,078(64.97) |
| 2                                                   |       |           | 1,022(15.73) |       |           | 1,088(13.92) |
| 3                                                   |       |           | 106(1.63)    |       |           | 104(1.33)    |
| <i>Health Outcomes</i>                              |       |           |              |       |           |              |
| Psychological distress (Mean(SD))                   | 7,866 | 46 (2016) | 1.77(2.13)   | 7,866 | 50 (2008) | 1.77(2.13)   |
| Subjective wellbeing - life satisfaction (Mean(SD)) | 8,487 | 46 (2016) | 7.35(1.89)   | 9,631 | 50 (2008) | 7.29(1.84)   |
| Self-rated general health (Mean(SD))                | 8,576 | 46 (2016) | 3.44(1.10)   | 9,733 | 50 (2008) | 3.48(1.11)   |

Note: \* Due to small counts for social isolation scores of 4, scores of 3 and 4 are combined.

Table S2. *Descriptive statistics for demographic, socioeconomic and health covariates using multiply imputed data m=50 (1970 BCS N = 16,585 and 1958 NCDS = 15,806)*

| Variable                                                                    | 1970 BCS   |           | 1958 NCDS  |           |
|-----------------------------------------------------------------------------|------------|-----------|------------|-----------|
|                                                                             | Age (year) | %         | Age (year) | %         |
| Self-reported sex (if female)                                               | 38 (2008)  | 53.17     | 42 (1999)  | 50.64     |
| Education – highest qualification - educated to degree level (if no degree) | 38 (2008)  | 96.18     | 42 (1999)  | 96.96     |
| Socioeconomic status – self-reported financial difficulties (if yes)        | 38 (2008)  | 10.13     | 42 (1999)  | 8.40      |
| Socioeconomic status – occupational social class                            | 38 (2008)  |           | 42 (1999)  |           |
| Professional/Managerial-technical                                           |            | 45.96     |            | 38.31     |
| Intermediate                                                                |            | 38.88     |            | 42.44     |
| Partly skilled/Unskilled                                                    |            | 14.51     |            | 18.92     |
| Others                                                                      |            | 0.66      |            | 0.33      |
| Socioeconomic status – homeownership (if no)                                | 38 (2008)  | 24.65     | 42 (1999)  | 20.10     |
| Health – self-rated general health (Mean(SE))                               | 38 (2008)  | 3.67(.01) | 42 (1999)  | 3.07(.01) |
| Health – limiting long standing illness (if yes)                            | 38 (2008)  | 17.18     | 42 (1999)  | 29.81     |
| Health – psychological distress (Mean(SE))                                  | 34 (2004)  | 1.75(.02) | 42 (1999)  | 1.55(.02) |
| Health – life satisfaction (Mean(SE))                                       | 34 (2004)  | 7.33(.02) | 42 (1999)  | 7.27(.02) |

Table S3. *Harmonisation of demographic, socioeconomic and health covariates, social isolation indicators and health outcomes*

| Measure                                                      | Cohort    | Age (year) | Variable | Item/Questionnaire                                                                                                                                                                                                                                                                                                                                                | Recode                                                                                            |
|--------------------------------------------------------------|-----------|------------|----------|-------------------------------------------------------------------------------------------------------------------------------------------------------------------------------------------------------------------------------------------------------------------------------------------------------------------------------------------------------------------|---------------------------------------------------------------------------------------------------|
| <i>Demographic, Socioeconomic and Health Covariates</i>      |           |            |          |                                                                                                                                                                                                                                                                                                                                                                   |                                                                                                   |
| Sex                                                          | 1970 BCS  | 38 (2008)  | b8cmsex  | Self-reported cohort member's sex                                                                                                                                                                                                                                                                                                                                 | Males = 0 Females = 1 recode 1=0 2=1                                                              |
|                                                              | 1958 NCDS | 42 (1999)  | n622_6   | Self-reported cohort member's sex                                                                                                                                                                                                                                                                                                                                 | Males = 0 Females = 1 recode 1=0 2=1                                                              |
| Education – highest qualification – educated to degree level | 1970 BCS  | 38 (2008)  | bd8achq1 | Highest Academic Qualification CM obtained in 2008 survey<br>-1 Level not calculable<br>0 No academic qualification<br>1 GCSE D-E<br>2 Other Scottish Quals<br>3 GCSE A-C, Scot Standards/Intermediate 1<br>4 Scot Intermediate 2 / AS Levels or 1 A Level<br>5 2+ A Levels, Scot Higher/6th<br>6 Diploma<br>7 Degree, PGCE, Other Degree qual<br>8 Higher Degree | Recode Degree, PGCE, Other Degree qual<br>8 Higher Degree = 0 anything else = 0 and no degree = 1 |
|                                                              | 1958 NCDS | 42 (1999)  | numdeg   | No. of degrees CM has obtained?                                                                                                                                                                                                                                                                                                                                   | Recode any degree = 0 no degree = 1                                                               |

|                                                                   |           |           |          |                                                                                                                                                                                                                                                |                                                                                                                                                    |
|-------------------------------------------------------------------|-----------|-----------|----------|------------------------------------------------------------------------------------------------------------------------------------------------------------------------------------------------------------------------------------------------|----------------------------------------------------------------------------------------------------------------------------------------------------|
| Socioeconomic status<br>– self-reported<br>financial difficulties | 1970 BCS  | 38 (2008) | b8finnow | How well would you say you personally are managing financially these days. Would you say you are<br>1 ...living comfortably<br>2 doing all right<br>3 just about getting by<br>4 finding it quite difficult or<br>5 finding it very difficult? | Recode 1 living comfortably 2 doing all right and 3 just about getting by = 0 and 4 finding it quite difficult and 5 finding it very difficult = 1 |
|                                                                   | 1958 NCDS | 42 (1999) | finnow   | How well would you say you personally are managing financially these days. Would you say you are<br>1 ...living comfortably<br>2 doing all right<br>3 just about getting by<br>4 finding it quite difficult or<br>5 finding it very difficult? | Recode 1 living comfortably 2 doing all right and 3 just about getting by = 0 and 4 finding it quite difficult and 5 finding it very difficult = 1 |
| Socioeconomic status<br>– occupational social<br>class            | 1970 BCS  | 38 (2008) | b8sc     | (Current Job) Social Class<br>1 I Professional<br>2 II Managerial-technical<br>3.1<br>3.2<br>4 IV Partly skilled<br>5 Unskilled<br>6 Others                                                                                                    | Recode<br>I Professional<br>II Managerial-technical = 0<br>3.1/3.2 = 1<br>IV Partly skilled<br>Unskilled = 2<br>Others = 3                         |
|                                                                   | 1958 NCDS | 42 (1999) | sc       | (Current Job) Social Class<br>1 I Professional<br>2 II Managerial-technical                                                                                                                                                                    | Recode<br>I Professional                                                                                                                           |



|                                       |           |           |         |                                                                                                                                                                                                                                 |                                                                                                                                                                                   |
|---------------------------------------|-----------|-----------|---------|---------------------------------------------------------------------------------------------------------------------------------------------------------------------------------------------------------------------------------|-----------------------------------------------------------------------------------------------------------------------------------------------------------------------------------|
|                                       |           |           |         | 3.1<br>3.2<br>4 IV Partly skilled<br>5 Unskilled<br>6 Others                                                                                                                                                                    | II Managerial-technical = 0<br>3.1/3.2 = 1<br>IV Partly skilled<br>Unskilled = 2<br>Others = 3                                                                                    |
| Socioeconomic status – home ownership | 1970 BCS  | 38 (2008) | b8ten2  | Do you own or rent your home or have some other arrangement?<br>1 Own - outright<br>2 Own - buying with help of a mortgage<br>3 Pay part rent and part mortgage<br>4 Rent it<br>5 Live here rent-free<br>6 Squatting<br>7 Other | Recode<br>1 Own - outright<br>2 Own - buying with help of a mortgage<br>3 Pay part rent and part mortgage = 0<br>4 Rent it<br>5 Live here rent-free<br>6 Squatting<br>7 Other = 1 |
|                                       | 1958 NCDS | 42 (1999) | tenure2 | Do you own or rent your home or have some other arrangement?<br>1 Own - outright<br>2 Own - buying with help of a mortgage<br>3 Pay part rent and part mortgage<br>4 Rent it<br>5 Live here rent-free<br>6 Squatting<br>7 Other | Recode<br>1 Own - outright<br>2 Own - buying with help of a mortgage<br>3 Pay part rent and part mortgage = 0<br>4 Rent it<br>5 Live here rent-free<br>6 Squatting<br>7 Other = 1 |

|                                         |           |           |                                                                           |                                                                                                                                                                                                             |                                                                               |
|-----------------------------------------|-----------|-----------|---------------------------------------------------------------------------|-------------------------------------------------------------------------------------------------------------------------------------------------------------------------------------------------------------|-------------------------------------------------------------------------------|
| Health – self-rated general health      | 1970 BCS  | 38 (2008) | b8hlthgn                                                                  | In general, would you say your health is...<br>1 Excellent<br>2 Very good<br>3 Good<br>4 Fair<br>5 Poor                                                                                                     | Recode so that high scores = better health 5 = “Excellent”, 1 = “Poor”        |
|                                         | 1958 NCDS | 42 (1999) | hlthgen                                                                   | How would you describe your health generally? Would you say it is ...<br>1 Excellent<br>2 Good<br>3 Fair<br>4 Poor                                                                                          | Recode so that high scores = better health 4 = “Excellent”, 1 = “Poor”        |
| Health – limiting long standing illness | 1970 BCS  | 38 (2008) | b8lsiotr<br>b8khllt                                                       | Whether CM Has Any (Other) Long Standing Illness/ Disability<br>Whether Health Limits Everyday Activities                                                                                                   | Combine items to get complete picture – if limiting long standing illness = 1 |
|                                         | 1958 NCDS | 42 (1999) | lsiany2                                                                   | Do you have any long-standing illness, disability or infirmity? By long-standing I mean anything that has troubled you over a period of time, or that is likely to affect you over a period of time? Yes/no | Recode yes = 1 no = 0                                                         |
| Health – psychological distress         | 1970 BCS  | 34 (2004) | b7mal02<br>b7mal03<br>b7mal05<br>b7mal09<br>b7mal12<br>b7mal14<br>b7mal16 | Malaise 9-item Questionnaire                                                                                                                                                                                | Total score                                                                   |

|                                    |           |           |                                                                   |                                                                                                                                                                                                                                                                     |                                                                                                                                      |
|------------------------------------|-----------|-----------|-------------------------------------------------------------------|---------------------------------------------------------------------------------------------------------------------------------------------------------------------------------------------------------------------------------------------------------------------|--------------------------------------------------------------------------------------------------------------------------------------|
|                                    |           |           | b7mal20<br>b7mal21                                                |                                                                                                                                                                                                                                                                     |                                                                                                                                      |
|                                    | 1958 NCDS | 42 (1999) | mal02 mal03<br>mal05 mal09<br>mal12 mal14<br>mal16 mal20<br>mal21 | Malaise 24-item Questionnaire reduced down to match the 9-item Questionnaire                                                                                                                                                                                        | Total score                                                                                                                          |
| Health – life satisfaction         | 1970 BCS  | 34 (2004) | b7lifet1                                                          | Here is a scale from 0 to 10, where '0' means that you are completely dissatisfied and '10' means that you are completely satisfied. Please enter the number which corresponds with how satisfied or dissatisfied you are with the way life has turned out so far   | 0-10                                                                                                                                 |
|                                    | 1958 NCDS | 42 (1999) | lifesat1                                                          | Here is a scale from 0-10 where '0' means that you are completely dissatisfied and '10' means that you are completely satisfied. Please enter the number which corresponds with how satisfied or dissatisfied you are about the way your life has turned out so far | 0-10                                                                                                                                 |
| <i>Social Isolation Indicators</i> |           |           |                                                                   |                                                                                                                                                                                                                                                                     |                                                                                                                                      |
| Living alone                       | 1970 BCS  | 42 (2012) | BD9HSIZE<br>B9GSLIVE<br>B9GRTOK                                   | Derived Household Size (bcs70_2012_derived.dta)<br>HHgrid: whether person living with CM at interview (bcs70_2012_persongrid.dta)<br>HHgrid: Person's relationship to CM (bcs70_2012_persongrid.dta)                                                                | Derived variable for living alone where living alone = 1 using household grid and household member's relationship to cohort member – |

|                                                                             |           |           |                                   |                                                                                                                                                                                              |                                                                                                                                                                                                          |
|-----------------------------------------------------------------------------|-----------|-----------|-----------------------------------|----------------------------------------------------------------------------------------------------------------------------------------------------------------------------------------------|----------------------------------------------------------------------------------------------------------------------------------------------------------------------------------------------------------|
|                                                                             |           |           |                                   |                                                                                                                                                                                              | cross-checked against the study derived variable for household size                                                                                                                                      |
|                                                                             | 1958 NCDS | 46 (2004) | nd7numhh<br>n7rtok12-<br>n7rtok20 | (Derived) Total number of people in household<br>Person's relationship to Cohort Member                                                                                                      | Derived variable for living alone where living alone = 1 using household grid and household member's relationship to cohort member – cross-checked against the study derived variable for household size |
| Lack of regular contact with friends and relatives outside of the household | 1970 BCS  | 42 (2012) | B9FREMT<br>B9FAMMT                | How often do you meet up with any of your friends? (bcs70_2012_flatfile.dta)<br>How often do you meet up with any members of your family who you do not live with? (bcs70_2012_flatfile.dta) | Recode to combine frequency of contact with family and friends and to indicate social isolation i.e., less than monthly contact = 1                                                                      |
|                                                                             | 1958 NCDS | 44 (2002) | seerels<br>visrels<br>numpals     | How often do you have regular contact with relatives outside your household?                                                                                                                 | Recode to combine frequency of                                                                                                                                                                           |

|                                 |           |                        |                                                   |                                                                                                                                                                                                                                                                                                                                                                      |                                                                                                                                                                                                                                          |
|---------------------------------|-----------|------------------------|---------------------------------------------------|----------------------------------------------------------------------------------------------------------------------------------------------------------------------------------------------------------------------------------------------------------------------------------------------------------------------------------------------------------------------|------------------------------------------------------------------------------------------------------------------------------------------------------------------------------------------------------------------------------------------|
|                                 |           |                        |                                                   | How often do you visit or are you visited by relatives who live outside your household?<br>How often do you have regular contact with friends or acquaintances outside your household?                                                                                                                                                                               | contact with family and friends and to indicate social isolation i.e., less than monthly contact = 1                                                                                                                                     |
| Out of education and employment | 1970 BCS  | 42 (2012)              | BD9EACT                                           | (Derived) Current economic activity status                                                                                                                                                                                                                                                                                                                           | Recode so that being in neither education nor employment = 1                                                                                                                                                                             |
|                                 | 1958 NCDS | 46 (2004)              | nd7eact                                           | (Derived) Current economic activity status                                                                                                                                                                                                                                                                                                                           | Recode so that being in neither education nor employment = 1                                                                                                                                                                             |
| Lack of community engagement    | 1970 BCS  | 42 (2012)<br>46 (2016) | B10Q26<br>B10Q27<br>B9SCQ23<br>B9SCQ1W<br>B9SCQ1X | Whether CM is currently a member of any organisations, clubs or societies? How often CM participates in meetings/events/activities of any organisations?<br>How often, if ever, do you attend any kind of religious service or meeting?<br>How often have you done each of the following activities in the last 12 months? (voluntary organisation) (voluntary work) | Generate variables for membership to community group or organisation, volunteering and regular religious activity (i.e., at least monthly) then generate social isolation indicator for community context - isolated across 2/3 no group |

|                              |           |           |                                                                                          |                                                                                                                                                                                                                                 |                                                                                                                                                                                                                                                                                                            |
|------------------------------|-----------|-----------|------------------------------------------------------------------------------------------|---------------------------------------------------------------------------------------------------------------------------------------------------------------------------------------------------------------------------------|------------------------------------------------------------------------------------------------------------------------------------------------------------------------------------------------------------------------------------------------------------------------------------------------------------|
|                              |           |           |                                                                                          |                                                                                                                                                                                                                                 | membership, no volunteering and no regular religious activity = 1                                                                                                                                                                                                                                          |
|                              | 1958 NCDS | 46 (2004) | nd7hobby<br>nd7othg<br>n7rnoveq<br>nd7youth<br>nd7polit<br>nd7eco<br>nd7othv<br>nd7local | I'd like you to think about any groups, clubs or organisations that you've been involved with since we last saw you in [^date of last interview]<br>How often, if ever, do you attend any kind of religious service or meeting? | Generate variables for membership to community group or organisation, volunteering and regular religious activity (i.e., at least monthly) then generate social isolation indicator for community context - isolated across 2/3 no group membership, no volunteering and no regular religious activity = 1 |
| Total social isolation score | 1970 BCS  | 42 (2012) | Living alone                                                                             | Sum of all social isolation indicators – capped at 3 i.e., those scoring 4 combined with those scoring 3 due to very low counts.                                                                                                | Sum of all social isolation indicators (0-3)                                                                                                                                                                                                                                                               |
|                              | 1958 NCDS | 46 (2004) | Lack of regular contact with                                                             |                                                                                                                                                                                                                                 |                                                                                                                                                                                                                                                                                                            |

|                        |           |           |                                                                                                                           |                              |             |
|------------------------|-----------|-----------|---------------------------------------------------------------------------------------------------------------------------|------------------------------|-------------|
|                        |           |           | friends and relatives outside of the household<br><br>Out of education and employment<br><br>Lack of community engagement |                              |             |
| <i>Health Outcomes</i> |           |           |                                                                                                                           |                              |             |
| Psychological distress | 1970 BCS  | 46 (2016) | B10Q28A<br>B10Q28B<br>B10Q28C<br>B10Q28D<br>B10Q28E<br>B10Q28F<br>B10Q28G<br>B10Q28H<br>B10Q28I                           | Malaise 9-item Questionnaire | Total score |
|                        | 1958 NCDS | 50 (2008) | N8MAL02<br>N8MAL03<br>N8MAL05<br>N8MAL09<br>N8MAL12<br>N8MAL14<br>N8MAL16                                                 | Malaise 9-item Questionnaire | Total score |

|                                             |           |           |                    |                                                                                                                                                                                                                                                                   |                                           |
|---------------------------------------------|-----------|-----------|--------------------|-------------------------------------------------------------------------------------------------------------------------------------------------------------------------------------------------------------------------------------------------------------------|-------------------------------------------|
|                                             |           |           | N8MAL20<br>N8MAL21 |                                                                                                                                                                                                                                                                   |                                           |
| Subjective wellbeing -<br>life satisfaction | 1970 BCS  | 46 (2016) | B10LIFST1          | Here is a scale from 0 to 10, where '0' means that you are completely dissatisfied and '10' means that you are completely satisfied. Please enter the number which corresponds with how satisfied or dissatisfied you are with the way life has turned out so far | 0-10                                      |
|                                             | 1958 NCDS | 50 (2008) | N8LIFET1           | Here is a scale from 0 to 10, where '0' means that you are completely dissatisfied and '10' means that you are completely satisfied. Please enter the number which corresponds with how satisfied or dissatisfied you are with the way life has turned out so far | 0-10                                      |
| Self-rated general<br>health                | 1970 BCS  | 46 (2016) | B10HLTHGN          | In general, would you say your health is<br>1. excellent 2. very good 3. good 4. fair 5. poor?                                                                                                                                                                    | Reverse code so that excellent health = 5 |
|                                             | 1958 NCDS | 50 (2008) | N8HLTHGN           | In general, would you say your health is<br>1. excellent 2. very good 3. good 4. fair 5. poor?                                                                                                                                                                    | Reverse code so that excellent health = 5 |



Table S4. *N(%) of missing cases for covariates, social isolation indicators and health outcomes (Full sample N = 32,391, 1970 BCS N = 16,585, 1958 NCDS N = 15,806)*

| Measure                                                      | Cohort    | Age (year) | N(%) missing                | Study outcome non-response |
|--------------------------------------------------------------|-----------|------------|-----------------------------|----------------------------|
| <i>Demographic, Socioeconomic and Health Covariates</i>      |           |            |                             |                            |
| Sex (at birth)<br>Self-reported sex                          | 1970 BCS  | 38 (2008)  | 1,359(8.19)<br>7,781(46.92) | -                          |
|                                                              | 1958 NCDS | 42 (1999)  | 1(0.01)<br>4,593(29.06)     | -                          |
| Education – highest qualification - educated to degree level | 1970 BCS  | 38 (2008)  | 7,821(47.16)                | -                          |
|                                                              | 1958 NCDS | 42 (1999)  | 1(0.01)                     | -                          |
| Socioeconomic status – self-reported financial difficulties  | 1970 BCS  | 38 (2008)  | 7,812(47.10)                | -                          |
|                                                              | 1958 NCDS | 42 (1999)  | 4,632(29.31)                | -                          |
| Socioeconomic status – occupational social class             | 1970 BCS  | 38 (2008)  | 9,162(55.24)                | -                          |
|                                                              | 1958 NCDS | 42 (1999)  | 6,319(39.98)                | -                          |
| Socioeconomic status – home ownership                        | 1970 BCS  | 38 (2008)  | 7,828(47.20)                | -                          |
|                                                              | 1958 NCDS | 42 (1999)  | 4,675(29.58)                | -                          |
| Health – self-rated general health                           | 1970 BCS  | 38 (2008)  | 7,815(47.12)                | -                          |
|                                                              | 1958 NCDS | 42 (1999)  | 4,635(29.32)                | -                          |
| Health – limiting long standing illness                      | 1970 BCS  | 38 (2008)  | 7,782(46.92)                | -                          |
|                                                              | 1958 NCDS | 42 (1999)  | 4,635(29.32)                | -                          |
| Health – psychological distress                              | 1970 BCS  | 34 (2004)  | 7,140(43.05)                | -                          |
|                                                              | 1958 NCDS | 42 (1999)  | 4,730(29.93)                | -                          |
| Health – life satisfaction                                   | 1970 BCS  | 34 (2004)  | 7,144(43.08)                | -                          |
|                                                              | 1958 NCDS | 42 (1999)  | 4,737(29.97)                | -                          |

|                                                                             |           |           |               |            |
|-----------------------------------------------------------------------------|-----------|-----------|---------------|------------|
|                                                                             |           |           |               |            |
| <i>Social Isolation Indicators</i>                                          |           |           |               |            |
| Living alone                                                                | 1970 BCS  | 42 (2012) | 6,783(40.90)  | -          |
|                                                                             | 1958 NCDS | 46 (2004) | 6,374(40.33)  | -          |
| Lack of regular contact with friends and relatives outside of the household | 1970 BCS  | 42 (2012) | 6,836(41.22)  | -          |
|                                                                             | 1958 NCDS | 44 (2002) | 7,324(46.34)  | -          |
| Out of education and employment                                             | 1970 BCS  | 42 (2012) | 6,818(41.11)  | -          |
|                                                                             | 1958 NCDS | 46 (2004) | 6,358(40.23)  | -          |
| Lack of community engagement                                                | 1970 BCS  | 42 (2012) | 10,073(60.74) | -          |
|                                                                             | 46 (2016) |           |               |            |
| Total social isolation score (0-3)*                                         | 1958 NCDS | 46 (2004) | 6,365(40.27)  | -          |
|                                                                             | 1970 BCS  | 42 (2012) | 10,088(60.83) | -          |
|                                                                             | 1958 NCDS | 46 (2004) | 7,990(50.55)  | -          |
| <i>Health Outcomes</i>                                                      |           |           |               |            |
| Psychological distress                                                      | 1970 BCS  | 46 (2016) | 8,719(52.57)  | 715(4.31%) |
|                                                                             | 1958 NCDS | 50 (2008) | 6,172(39.05)  | 156(0.99%) |
| Subjective wellbeing - life satisfaction                                    | 1970 BCS  | 46 (2016) | 8,098(48.83)  | 94(0.57%)  |
|                                                                             | 1958 NCDS | 50 (2008) | 6,175(39.07)  | 159(1.01%) |
| Self-rated general health                                                   | 1970 BCS  | 46 (2016) | 8,009(48.29)  | 5(0.03%)   |
|                                                                             | 1958 NCDS | 50 (2008) | 6,073(38.42)  | 57(0.36%)  |

Note: 8,004(48.26%) of cases in 1970 BCS were unproductive in the most recent data collection sweep (age 46) i.e., they did not take part at all. Any missingness above and beyond 8,004 cases in the outcome is due to item non-response. 6,016(38.06%) unproductive cases in 1958 NCDS. \* Due to small counts for social isolation scores of 4, scores of 3 and 4 are combined.

Table S5. Linear multivariable regression models for each separate social isolation indicator to identify (1) independent effects of each social isolation indicator and (2) cohort effects in these independent effects on psychological distress, life satisfaction and self-rated general health using multiply imputed data  $m=50$  (Full sample  $N = 32,391$ , Males  $N = 15,810$ , Females  $N = 15,221$ )

| All coefficients presented are for each independent social isolation indicator only (exposure) | Psychological distress<br>coef [95% CI] |                          | Life satisfaction<br>coef [95% CI] |                            | Self-rated general health<br>coef [95% CI] |                             |
|------------------------------------------------------------------------------------------------|-----------------------------------------|--------------------------|------------------------------------|----------------------------|--------------------------------------------|-----------------------------|
|                                                                                                | (1)Independent                          | (2)*Cohort               | (1)Independent                     | (2)*Cohort                 | (1)Independent                             | (2)*Cohort                  |
| <i>Living alone</i>                                                                            |                                         |                          |                                    |                            |                                            |                             |
| <i>Full sample model</i>                                                                       | .029<br>[-.019 - .076]                  | .008<br>[-.081 - .097]   | -.205***<br>[-.254 - -.155]        | .069<br>[-.026 - .164]     | -.040<br>[-.090 - .009]                    | -.139***<br>[-.231 - -.047] |
| <i>Males only</i>                                                                              | .026<br>[-.031 - .083]                  | -.016<br>[-.124 - .091]  | -.203***<br>[-.262 - -.144]        | .082<br>[-.033 - .197]     | -.053*<br>[-.114 - .008]                   | -.133**<br>[-.248 - -.018]  |
| <i>Females only</i>                                                                            | .020<br>[-.044 - .085]                  | .048<br>[-.078 - .174]   | -.223***<br>[-.291 - -.155]        | .052<br>[-.092 - .196]     | -.038<br>[-.104 - .029]                    | -.137**<br>[-.262 - -.012]  |
| <i>Lack of regular contact with friends and relatives outside of the household</i>             |                                         |                          |                                    |                            |                                            |                             |
| <i>Full sample model</i>                                                                       | .066<br>[-.027 - .159]                  | -.190*<br>[-.406 - .027] | -.206***<br>[-.306 - -.106]        | .078<br>[-.145 - .301]     | -.094**<br>[-.182 - -.006]                 | -.062<br>[-.284 - .160]     |
| <i>Males only</i>                                                                              | .042<br>[-.074 - .158]                  | -.191<br>[-.449 - .068]  | -.198***<br>[-.314 - -.083]        | .051<br>[-.209 - .310]     | -.091*<br>[-.199 - .018]                   | -.058<br>[-.336 - .220]     |
| <i>Females only</i>                                                                            | .081<br>[-.043 - .205]                  | -.204<br>[-.523 - .116]  | -.232***<br>[-.375 - -.088]        | .098<br>[-.257 - .453]     | -.095<br>[-.222 - .033]                    | -.081<br>[-.385 - .223]     |
| <i>Out of education and employment</i>                                                         |                                         |                          |                                    |                            |                                            |                             |
| <i>Full sample model</i>                                                                       | .198***<br>[.149 - .248]                | -.027<br>[-.117 - .062]  | -.131***<br>[-.176 - -.086]        | -.080**<br>[-.149 - -.010] | -.260***<br>[-.298 - -.222]                | -.186***<br>[-.266 - -.106] |
| <i>Males only</i>                                                                              | .252***<br>[.181 - .323]                | -.029<br>[-.149 - .090]  | -.147***<br>[-.215 - -.078]        | -.093*<br>[-.200 - .014]   | -.305***<br>[-.366 - -.245]                | -.238***<br>[-.357 - -.118] |
| <i>Females only</i>                                                                            | .183*** [.128<br>- .238]                | -.046<br>[-.150 - .058]  | -.096***<br>[-.149 - -.043]        | -.071<br>[-.160 - .019]    | -.222***<br>[-.267 - -.177]                | -.157***<br>[-.248 - -.066] |
| <i>Lack of community engagement</i>                                                            |                                         |                          |                                    |                            |                                            |                             |

|                          |                         |                        |                             |                         |                             |                         |
|--------------------------|-------------------------|------------------------|-----------------------------|-------------------------|-----------------------------|-------------------------|
| <i>Full sample model</i> | .014<br>[-.019 - .048]  | .021<br>[-.041 - .083] | -.062***<br>[-.096 - -.028] | -.007<br>[-.072 - .057] | -.049***<br>[-.079 - -.019] | -.002<br>[-.066 - .062] |
| <i>Males only</i>        | -.002<br>[-.047 - .042] | .028<br>[-.054 - .111] | -.074***<br>[-.117 - -.030] | -.032<br>[-.119 - .055] | -.051**<br>[-.093 - .010]   | -.010<br>[-.097 - .077] |
| <i>Females only</i>      | .024<br>[-.018 - .065]  | .017<br>[-.068 - .102] | -.055**<br>[-.100 - -.009]  | .013<br>[-.069 - .095]  | -.049**<br>[-.087 - -.010]  | .011<br>[-.069 - .092]  |

Note: All models use multiply imputed data, adjusted for the full covariate set and are run once with a cohort dummy variable and again to include a cohort interaction term (\*cohort). Health outcomes are standardised, and continuous covariates centred. Coefficients are reported for independent and cohort interaction effects. Male and female samples do not = total sample due to some missing data on the sex at birth variable. Additional models were run for each social isolation indicator controlling for all other indicators to assess the independent associations net of the other social isolation domains – results were consistent with the above models.

\*\*\*  $p < 0.01$ , \*\*  $p < 0.05$ , \*  $p < 0.1$

Table S6. Linear multivariable regression models for each separate social isolation indicator to identify (1) independent effects of each social isolation indicator and (2) cohort effects in these independent effects on psychological distress, life satisfaction and self-rated general health – complete case

| All coefficients presented are for each independent social isolation indicator only (exposure) | Psychological distress           |                                     | Life satisfaction                     |                                   | Self-rated general health            |                                       |
|------------------------------------------------------------------------------------------------|----------------------------------|-------------------------------------|---------------------------------------|-----------------------------------|--------------------------------------|---------------------------------------|
|                                                                                                | coef<br>[95% CI]<br>N            |                                     | coef<br>[95% CI]<br>N                 |                                   | coef<br>[95% CI]<br>N                |                                       |
|                                                                                                | (1)Independent                   | (2)*Cohort                          | (1)Independent                        | (2)*Cohort                        | (1)Independent                       | (2)*Cohort                            |
| <i>Living alone</i>                                                                            |                                  |                                     |                                       |                                   |                                      |                                       |
| <i>Full sample model</i>                                                                       | .011<br>[-.040 - .062]<br>11,806 | .041<br>[-.060 - .142]<br>11,806    | -.177***<br>[-.231 - -.124]<br>12,114 | .035<br>[-.071 - .142]<br>12,114  | -.066**<br>[-.118 - -.014]<br>12,160 | -.138***<br>[-.242 - -.035]<br>12,160 |
| <i>Males only</i>                                                                              | -.002<br>[-.063 - .059]<br>5,822 | -.017<br>[-.140 - .106]<br>5,822    | -.175***<br>[-.243 - -.106]<br>5,972  | .055<br>[-.082 - .192]<br>5,972   | -.080**<br>[-.148 - -.012]<br>6,000  | -.129*<br>[-.265 - .007]<br>6,000     |
| <i>Females only</i>                                                                            | .051<br>[-.037 - .139]<br>5,663  | .143<br>[-.033 - .320]<br>5,663     | -.188***<br>[-.277 - -.099]<br>5,794  | .000<br>[-.177 - .177]<br>5,794   | -.061<br>[-.145 - .023]<br>5,811     | -.116<br>[-.284 - .052]<br>5,811      |
| <i>Lack of regular contact with friends and relatives outside of the household</i>             |                                  |                                     |                                       |                                   |                                      |                                       |
| <i>Full sample model</i>                                                                       | .029<br>[-.079 - .137]<br>11,256 | -.226*<br>[-.467 - .015]<br>11,256  | -.211***<br>[-.323 - -.099]<br>11,562 | -.024<br>[-.279 - .230]<br>11,562 | -.031<br>[-.140 - .078]<br>11,604    | -.182<br>[-.430 - .066]<br>11,604     |
| <i>Males only</i>                                                                              | .075<br>[-.055 - .205]<br>5,531  | -.331**<br>[-.609 - -.054]<br>5,531 | -.226***<br>[-.367 - -.085]<br>5,681  | -.062<br>[-.369 - .245]<br>5,681  | -.085<br>[-.226 - .055]<br>5,710     | -.094<br>[-.401 - .212]<br>5,710      |
| <i>Females only</i>                                                                            | -.025<br>[-.211 - .160]<br>5,404 | -.089<br>[-.532 - .353]<br>5,404    | -.152<br>[-.338 - .035]<br>5,533      | -.014<br>[-.463 - .435]<br>5,533  | .065<br>[-.113 - .243]<br>5,545      | -.335<br>[-.763 - .094]<br>5,545      |

| <i>Out of education and employment</i> |                                    |                                   |                                       |                                      |                                       |                                      |
|----------------------------------------|------------------------------------|-----------------------------------|---------------------------------------|--------------------------------------|---------------------------------------|--------------------------------------|
| <i>Full sample model</i>               | .238***<br>[.170 - .305]<br>11,807 | .090<br>[-.048 - .227]<br>11,807  | -.198***<br>[-.269 - -.127]<br>12,114 | -.154**<br>[-.297 - -.010]<br>12,114 | -.302***<br>[-.371 - -.234]<br>12,160 | -.147**<br>[-.286 - -.009]<br>12,160 |
| <i>Males only</i>                      | .290***<br>[.178 - .402]<br>5,824  | .111<br>[-.127 - .348]<br>5,824   | -.245***<br>[-.370 - -.120]<br>5,974  | -.412***<br>[-.676 - -.148]<br>5,974 | -.442***<br>[-.565 - -.320]<br>6,002  | -.454***<br>[-.713 - -.195]<br>6,002 |
| <i>Females only</i>                    | .228***<br>[.139 - .317]<br>5,662  | .034<br>[-.147 - .216]<br>5,662   | -.159***<br>[-.249 - -.070]<br>5,792  | -.066<br>[-.247 - .115]<br>5,792     | -.236***<br>[-.320 - -.151]<br>5,809  | -.010<br>[-.181 - .161]<br>5,809     |
| <i>Lack of community engagement</i>    |                                    |                                   |                                       |                                      |                                       |                                      |
| <i>Full sample model</i>               | .021<br>[-.011 - .054]<br>11,288   | -.023<br>[-.089 - .043]<br>11,288 | -.065***<br>[-.100 - -.030]<br>11,364 | -.009<br>[-.080 - .062]<br>11,364    | -.032*<br>[-.066 - .002]<br>11,403    | .001<br>[-.067 - .069]<br>11,403     |
| <i>Males only</i>                      | -.001<br>[-.044 - .042]<br>5,565   | -.001<br>[-.090 - .087]<br>5,565  | -.087***<br>[-.137 - -.038]<br>5,597  | -.033<br>[-.133 - .067]<br>5,597     | -.062**<br>[-.110 - -.013]<br>5,622   | -.002<br>[-.101 - .097]<br>5,622     |
| <i>Females only</i>                    | .044*<br>[-.006 - .094]<br>5,440   | -.033<br>[-.135 - .068]<br>5,440  | -.040<br>[-.091 - .011]<br>5,481      | -.001<br>[-.104 - .102]<br>5,481     | -.012<br>[-.060 - .037]<br>5,495      | .031<br>[-.067 - .129]<br>5,495      |

Note: All models use complete case data, adjusted for the full covariate set and are run once with a cohort dummy variable and again to include a cohort interaction term (\*cohort). Coefficients are reported for independent and cohort interaction effects.

\*\*\*  $p < 0.01$ , \*\*  $p < 0.05$ , \*  $p < 0.1$

Table S7. Linear multivariable regression models for each separate social isolation indicator to identify (1) independent effects of each social isolation indicator and (2) cohort effects in these independent effects on psychological distress, life satisfaction and self-rated general health using impute and delete data

| All coefficients presented are for each independent social isolation indicator only (exposure) | Psychological distress<br>Total sample N = 17,500<br>Males N = 8,185<br>Females N = 8,746<br>coef [95% CI] |                          | Life satisfaction<br>Total sample N = 18,118<br>Males N = 8,486<br>Females N = 9,008<br>coef [95% CI] |                            | Self-rated general health<br>Total sample N = 18,309<br>Males N = 8,600<br>Females N = 9,079<br>coef [95% CI] |                             |
|------------------------------------------------------------------------------------------------|------------------------------------------------------------------------------------------------------------|--------------------------|-------------------------------------------------------------------------------------------------------|----------------------------|---------------------------------------------------------------------------------------------------------------|-----------------------------|
|                                                                                                | (1)Independent                                                                                             | (2)*Cohort               | (1)Independent                                                                                        | (2)*Cohort                 | (1)Independent                                                                                                | (2)*Cohort                  |
| <i>Living alone</i>                                                                            |                                                                                                            |                          |                                                                                                       |                            |                                                                                                               |                             |
| <i>Full sample model</i>                                                                       | .031<br>[-.017 - .079]                                                                                     | .023<br>[-.068 - .115]   | -.207***<br>[-.257 - -.157]                                                                           | .063<br>[-.034 - .161]     | -.052**<br>[-.099 - -.005]                                                                                    | -.139***<br>[-.230 - -.048] |
| <i>Males only</i>                                                                              | .033<br>[-.024 - .091]                                                                                     | -.030<br>[-.142 - .081]  | -.190***<br>[-.255 - -.126]                                                                           | .088<br>[-.035 - .210]     | -.066**<br>[-.127 - -.006]                                                                                    | -.138**<br>[-.257 - -.020]  |
| <i>Females only</i>                                                                            | .046<br>[-.033 - .124]                                                                                     | .091<br>[-.067 - .248]   | -.240***<br>[-.325 - -.156]                                                                           | .026<br>[-.140 - .191]     | -.044<br>[-.120 - .031]                                                                                       | -.123*<br>[-.268 - .022]    |
| <i>Lack of regular contact with friends and relatives outside of the household</i>             |                                                                                                            |                          |                                                                                                       |                            |                                                                                                               |                             |
| <i>Full sample model</i>                                                                       | .047<br>[-.050 - .145]                                                                                     | -.190*<br>[-.416 - .035] | -.205***<br>[-.302 - -.108]                                                                           | .052<br>[-.195 - .298]     | -.088*<br>[-.181 - .006]                                                                                      | -.070<br>[-.293 - .153]     |
| <i>Males only</i>                                                                              | .035<br>[-.089 - .158]                                                                                     | -.207<br>[-.468 - .053]  | -.185***<br>[-.315 - -.054]                                                                           | .004<br>[-.292 - .301]     | -.086<br>[-.211 - .038]                                                                                       | -.061<br>[-.332 - .211]     |
| <i>Females only</i>                                                                            | .071<br>[-.080 - .222]                                                                                     | -.175<br>[-.574 - .225]  | -.234***<br>[-.391 - -.077]                                                                           | .096<br>[-.324 - .515]     | -.073<br>[-.223 - .077]                                                                                       | -.100<br>[-.476 - .277]     |
| <i>Out of education and employment</i>                                                         |                                                                                                            |                          |                                                                                                       |                            |                                                                                                               |                             |
| <i>Full sample model</i>                                                                       | .198***<br>[.154 - .243]                                                                                   | -.002<br>[-.083 - .079]  | -.131***<br>[-.176 - -.086]                                                                           | -.089**<br>[-.173 - -.005] | -.265***<br>[-.306 - -.224]                                                                                   | -.192***<br>[-.269 - -.114] |
| <i>Males only</i>                                                                              | .307***<br>[.229 - .386]                                                                                   | .003<br>[-.142 - .148]   | -.215***<br>[-.299 - -.131]                                                                           | -.088<br>[-.239 - .064]    | -.412***<br>[-.486 - -.337]                                                                                   | -.283***<br>[-.422 - -.144] |
| <i>Females only</i>                                                                            | .158***                                                                                                    | -.037                    | -.087***                                                                                              | -.065                      | -.202***                                                                                                      | -.139***                    |

|                                     |                         |                         |                             |                         |                             |                         |
|-------------------------------------|-------------------------|-------------------------|-----------------------------|-------------------------|-----------------------------|-------------------------|
|                                     | [.103 - .214]           | [-.140 - .066]          | [-.142 - -.032]             | [-.171 - .040]          | [-.253 - -.152]             | [-.238 - -.041]         |
| <i>Lack of community engagement</i> |                         |                         |                             |                         |                             |                         |
| <i>Full sample model</i>            | .012<br>[-.019 - .043]  | .014<br>[-.047 - .076]  | -.061***<br>[-.093 - -.029] | -.005<br>[-.072 - .062] | -.046***<br>[-.077 - -.015] | .004<br>[-.059 - .066]  |
| <i>Males only</i>                   | -.015<br>[-.057 - .028] | .037<br>[-.050 - .124]  | -.079***<br>[-.125 - -.032] | -.050<br>[-.145 - .045] | -.049**<br>[-.093 - -.004]  | -.013<br>[-.103 - .078] |
| <i>Females only</i>                 | .038<br>[-.008 - .083]  | -.005<br>[-.092 - .082] | -.045*<br>[-.091 - .001]    | .026<br>[-.068 - .120]  | -.044**<br>[-.087 - -.002]  | .026<br>[-.057 - .110]  |

Note: All models use multiply imputed data but with cohort members deleted who had missing data on outcomes, adjusted for the full covariate set and are run once with a cohort dummy variable and again to include a cohort interaction term (\*cohort). Coefficients are reported for independent and cohort interaction effects. Male and female samples do not = total sample due to missing data on the sex at birth variable.

\*\*\*  $p < 0.01$ , \*\*  $p < 0.05$ , \*  $p < 0.1$



Figure S1 (a, b, c and d). Model predicted marginal mean plots for significant ( $p < .10$ ) social isolation by cohort interactions on health outcomes

a

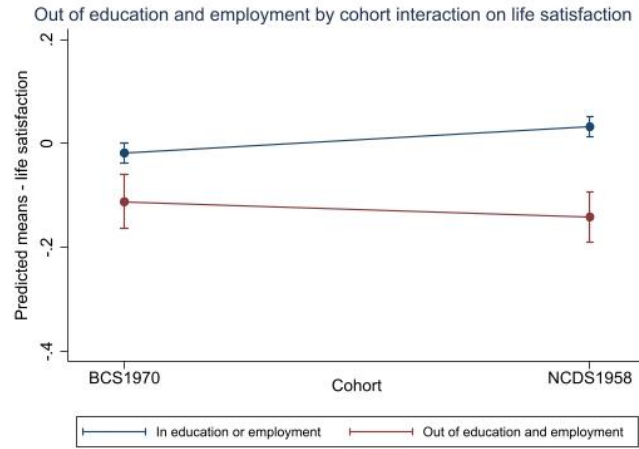

b

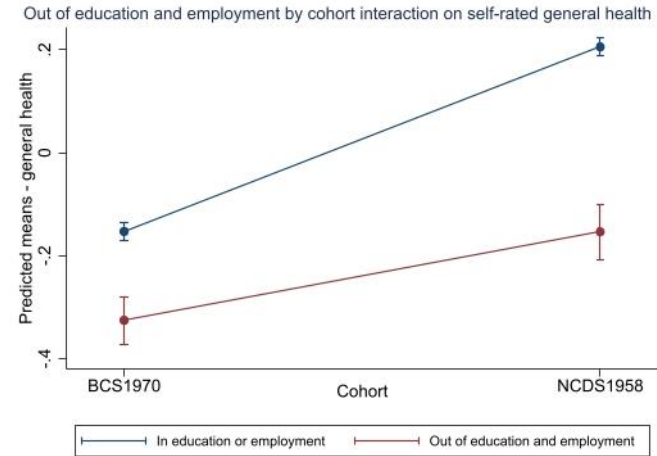

c

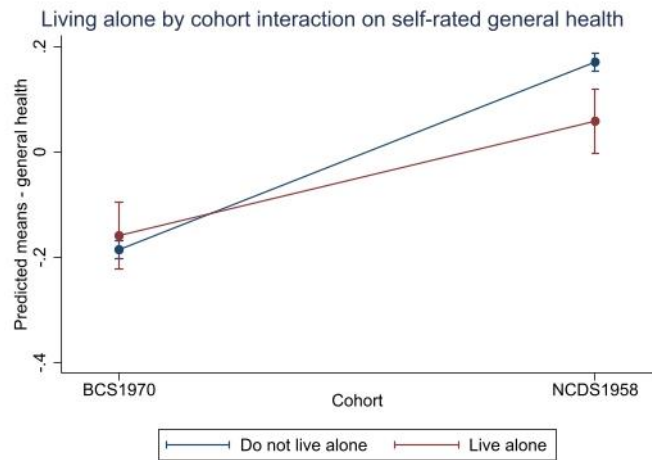

d

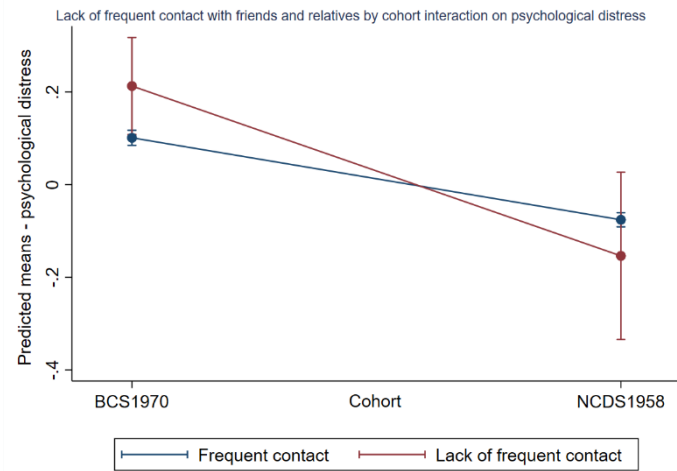

Figure S2. Model predicted marginal mean plot for cumulative social isolation score by cohort interaction on self-rated general health

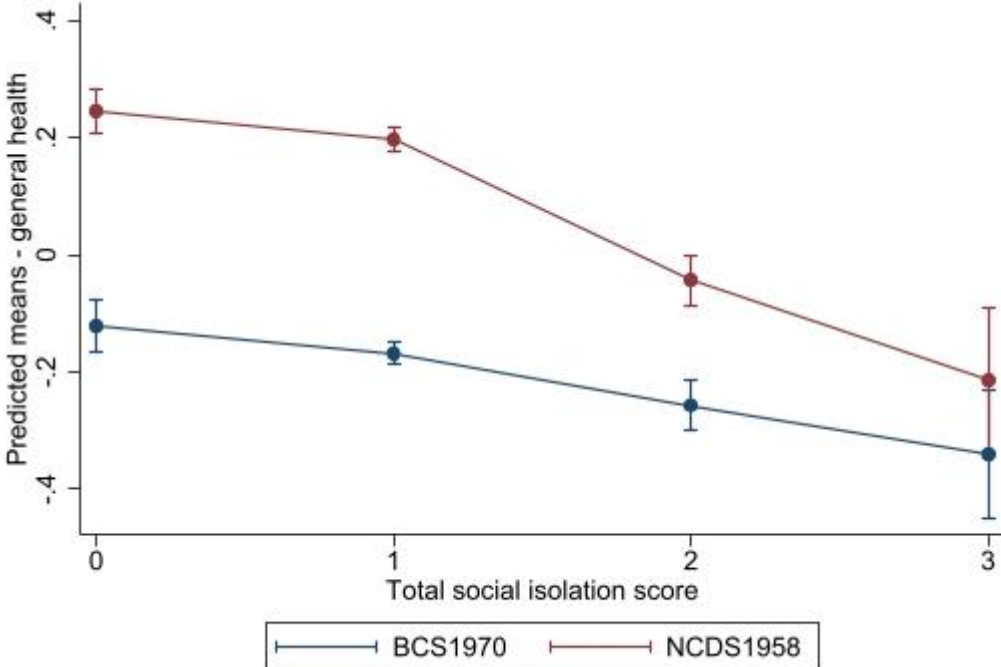

Table S8. Linear multivariable regression models for the cumulative social isolation score to identify 1) 'dose response' effects using the cumulative social isolation score, and 2) cohort effects in any 'dose-response' associations on psychological distress, life satisfaction and self-rated general health – complete case and impute and delete models

| All coefficients presented are for the cumulative social isolation score only (exposure) | Psychological distress<br>coef<br>[95% CI]<br>N |                                   | Life satisfaction<br>coef<br>[95% CI]<br>N |                                   | Self-rated general health<br>coef<br>[95% CI]<br>N |                                       |
|------------------------------------------------------------------------------------------|-------------------------------------------------|-----------------------------------|--------------------------------------------|-----------------------------------|----------------------------------------------------|---------------------------------------|
|                                                                                          | (1)'Dose response'                              | (2)*Cohort                        | (1)'Dose response'                         | (2)*Cohort                        | (1)'Dose response'                                 | (2)*Cohort                            |
| <i>Complete case</i>                                                                     |                                                 |                                   |                                            |                                   |                                                    |                                       |
| <i>Full sample model</i>                                                                 | .038***<br>[.012 - .064]<br>10,411              | -.008<br>[-.059 - .043]<br>10,411 | -.107***<br>[-.135 - -.080]<br>10,487      | -.002<br>[-.056 - .052]<br>10,487 | -.069***<br>[-.096 - -.042]<br>10,520              | -.052*<br>[-.104 - .001]<br>10,520    |
| <i>Males only</i>                                                                        | .019<br>[-.015 - .052]<br>5,083                 | -.025<br>[-.092 - .042]<br>5,083  | -.114***<br>[-.151 - -.076]<br>5,115       | -.019<br>[-.094 - .056]<br>5,115  | -.085***<br>[-.123 - -.048]<br>5,140               | -.070*<br>[-.144 - .004]<br>5,140     |
| <i>Females only</i>                                                                      | .066***<br>[.026 - .106]<br>5,045               | .010<br>[-.069 - .089]<br>5,045   | -.094***<br>[-.134 - -.053]<br>5,086       | -.002<br>[-.082 - .079]<br>5,086  | -.060***<br>[-.099 - -.021]<br>5,094               | -.014<br>[-.091 - .063]<br>5,094      |
| <i>Impute and delete</i>                                                                 |                                                 |                                   |                                            |                                   |                                                    |                                       |
| <i>Full sample model</i>                                                                 | .065***<br>[.044 - .086]<br>17,500              | .003<br>[-.037 - .044]<br>17,500  | -.116***<br>[-.138 - -.093]<br>18,118      | -.004<br>[-.048 - .039]<br>18,118 | -.105***<br>[-.126 - -.084]<br>18,309              | -.077***<br>[-.117 - -.037]<br>18,309 |
| <i>Males only</i>                                                                        | .054***<br>[.025 - .083]<br>8,185               | .002<br>[-.053 - .058]<br>8,185   | -.132***<br>[-.165 - -.100]<br>8,486       | -.006<br>[-.068 - .056]<br>8,486  | -.114***<br>[-.144 - -.084]<br>8,600               | -.091***<br>[-.149 - -.033]<br>8,600  |
| <i>Females only</i>                                                                      | .082***<br>[.051 - .114]<br>8,746               | -.007<br>[-.066 - .053]<br>8,746  | -.100***<br>[-.133 - -.067]<br>9,008       | .002<br>[-.061 - .066]<br>9,008   | -.100***<br>[-.130 - -.071]<br>9,079               | -.056**<br>[-.112 - .000]<br>9,079    |

Note: All models are adjusted for the full covariate set and are run once with a cohort dummy variable and again to include a cohort interaction term (\*cohort). Coefficients are reported for 'dose response' and cohort interaction effects.

\*\*\*  $p < 0.01$ , \*\*  $p < 0.05$ , \*  $p < 0.1$

Table S9. *Linear multivariable regression models for the interaction between multiple social isolation indicators to identify 1) the additive and multiplicative interaction effects, and 2) cohort effects in any interaction associations on psychological distress, life satisfaction and self-rated general health using multiply imputed data m=50 (Full sample N = 32,391, Males N = 15,810, Females N = 15,221)*

| All coefficients presented are for interactions between multiple social isolation indicators (exposure)            | Psychological distress<br>coef [95% CI] |                         | Life satisfaction<br>coef [95% CI] |                         | Self-rated general health<br>coef [95% CI] |                         |
|--------------------------------------------------------------------------------------------------------------------|-----------------------------------------|-------------------------|------------------------------------|-------------------------|--------------------------------------------|-------------------------|
|                                                                                                                    | (1)Interaction                          | (2)*Cohort              | (1)Interaction                     | (2)*Cohort              | (1)Interaction                             | (2)*Cohort              |
| <i>Living alone* Lack of regular contact with friends and relatives outside of the household</i>                   |                                         |                         |                                    |                         |                                            |                         |
| <i>Full sample model</i>                                                                                           | .114<br>[-.162 - .390]                  | -.212<br>[-.815 - .391] | -.038<br>[-.317 - .240]            | -.099<br>[-.744 - .546] | .018<br>[-.236 - .273]                     | -.057<br>[-.673 - .559] |
| <i>Males only</i>                                                                                                  | .098<br>[-.245 - .442]                  | -.164<br>[-.866 - .537] | .031<br>[-.313 - .375]             | -.372<br>[-1.15 - .404] | -.054<br>[-.374 - .267]                    | -.123<br>[-.904 - .657] |
| <i>Females only</i>                                                                                                | .191<br>[-.328 - .709]                  | -.402<br>[-1.77 - .963] | -.172<br>[-.711 - .368]            | .454<br>[-.874 - 1.78]  | .115<br>[-.348 - .577]                     | .195<br>[-.938 - 1.33]  |
| <i>Living alone* Out of education and employment</i>                                                               |                                         |                         |                                    |                         |                                            |                         |
| <i>Full sample model</i>                                                                                           | .077<br>[-.018 - .172]                  | -.111<br>[-.293 - .071] | -.097*<br>[-.198 - .005]           | .035<br>[-.160 - .231]  | -.021<br>[-.114 - .070]                    | .052<br>[-.130 - .233]  |
| <i>Males only</i>                                                                                                  | .041<br>[-.089 - .171]                  | -.102<br>[-.352 - .148] | -.038<br>[-.175 - .099]            | .033<br>[-.224 - .289]  | .052<br>[-.074 - .178]                     | .079<br>[-.174 - .332]  |
| <i>Females only</i>                                                                                                | .106<br>[-.058 - .270]                  | -.175<br>[-.472 - .123] | -.161*<br>[-.337 - .015]           | .052<br>[-.252 - .356]  | -.078<br>[-.222 - .066]                    | .058<br>[-.228 - .345]  |
| <i>Living alone* Lack of community engagement</i>                                                                  |                                         |                         |                                    |                         |                                            |                         |
| <i>Full sample model</i>                                                                                           | -.010<br>[-.107 - .086]                 | -.003<br>[-.191 - .186] | .005<br>[-.103 - .113]             | .001<br>[-.216 - .217]  | .003<br>[-.099 - .104]                     | -.006<br>[-.192 - .180] |
| <i>Males only</i>                                                                                                  | .029<br>[-.104 - .161]                  | .056<br>[-.199 - .311]  | -.030<br>[-.179 - .118]            | -.050<br>[-.341 - .240] | .004<br>[-.143 - .151]                     | -.079<br>[-.331 - .173] |
| <i>Females only</i>                                                                                                | -.053<br>[-.199 - .093]                 | -.084<br>[-.404 - .237] | .052<br>[-.109 - .213]             | .051<br>[-.267 - .368]  | .016<br>[-.137 - .170]                     | .078<br>[-.227 - .383]  |
| <i>Lack of regular contact with friends and relatives outside of the household*Out of education and employment</i> |                                         |                         |                                    |                         |                                            |                         |

|                                                                                                                  |                        |                         |                         |                         |                           |                         |
|------------------------------------------------------------------------------------------------------------------|------------------------|-------------------------|-------------------------|-------------------------|---------------------------|-------------------------|
| <i>Full sample model</i>                                                                                         | .030<br>[-.149 - .209] | -.007<br>[-.455 - .441] | .020<br>[-.177 - .216]  | .071<br>[-.410 - .551]  | .052<br>[-.113 - .218]    | .077<br>[-.370 - .524]  |
| <i>Males only</i>                                                                                                | .014<br>[-.276 - .303] | .013<br>[-.539 - .566]  | .049<br>[-.255 - .354]  | .091<br>[-.612 - .794]  | .110<br>[-.159 - .379]    | .017<br>[-.572 - .606]  |
| <i>Females only</i>                                                                                              | .055<br>[-.214 - .323] | -.092<br>[-.778 - .593] | -.002<br>[-.287 - .283] | .056<br>[-.731 - .844]  | .037<br>[-.207 - .280]    | .158<br>[-.543 - .858]  |
| <i>Lack of regular contact with friends and relatives outside of the household* Lack of community engagement</i> |                        |                         |                         |                         |                           |                         |
| <i>Full sample model</i>                                                                                         | .050<br>[-.191 - .29]  | -.119<br>[-.771 - .534] | .086<br>[-.153 - .325]  | -.215<br>[-.965 - .536] | -.045<br>[-.261 - .171]   | .030<br>[-.656 - .717]  |
| <i>Males only</i>                                                                                                | .098<br>[-.235 - .431] | -.116<br>[-.897 - .665] | .035<br>[-.324 - .395]  | -.271<br>[-1.26 - .713] | -.046<br>[-.365 - .273]   | .059<br>[-.802 - .919]  |
| <i>Females only</i>                                                                                              | .016<br>[-.323 - .354] | -.240<br>[-1.39 - .909] | .130<br>[-.213 - .474]  | -.057<br>[-1.26 - 1.15] | -.043<br>[-.362 - .275]   | -.028<br>[-1.21 - 1.15] |
| <i>Out of education and employment* Lack of community engagement</i>                                             |                        |                         |                         |                         |                           |                         |
| <i>Full sample model</i>                                                                                         | .054<br>[-.024 - .132] | .056<br>[-.100 - .212]  | -.035<br>[-.117 - .047] | .012<br>[-.154 - .179]  | -.070*<br>[-.151 - .011]  | -.000<br>[-.149 - .149] |
| <i>Males only</i>                                                                                                | .036<br>[-.112 - .184] | .055<br>[-.233 - .344]  | -.071<br>[-.221 - .079] | -.088<br>[-.393 - .216] | -.003<br>[-.141 - .136]   | .114<br>[-.143 - .372]  |
| <i>Females only</i>                                                                                              | .052<br>[-.055 - .159] | .056<br>[-.143 - .254]  | -.012<br>[-.126 - .102] | .057<br>[-.157 - .272]  | -.096**<br>[-.192 - .000] | -.071<br>[-.268 - .126] |

Note: All models use multiply imputed data, adjusted for the full covariate set and are run once with a cohort dummy variable and again to include a cohort interaction term (\*cohort). Health outcomes are standardised, and continuous covariates centred. Coefficients are reported for social isolation indicator interactions and cohort interaction effects. Male and female samples do not = total sample due to some missing data on the sex at birth variable.

\*\*\*  $p < 0.01$ , \*\*  $p < 0.05$ , \*  $p < 0.1$

Table S10. Linear multivariable regression models for the interaction between multiple social isolation indicators to identify 1) the additive and multiplicative interaction effects, and 2) cohort effects in any interaction associations on psychological distress, life satisfaction and self-rated general health using complete case data

| All coefficients presented are for interactions between multiple social isolation indicators (exposure) | Psychological distress<br>coef [95% CI]<br>p-value<br>N                                          |                                   | Life satisfaction<br>coef [95% CI]<br>p-value<br>N |                                     | Self-rated general health<br>coef [95% CI]<br>p-value<br>N |                                   |
|---------------------------------------------------------------------------------------------------------|--------------------------------------------------------------------------------------------------|-----------------------------------|----------------------------------------------------|-------------------------------------|------------------------------------------------------------|-----------------------------------|
|                                                                                                         | (1)Interaction                                                                                   | (2)*Cohort                        | (1)Interaction                                     | (2)*Cohort                          | (1)Interaction                                             | (2)*Cohort                        |
|                                                                                                         | <i>Living alone* Lack of regular contact with friends and relatives outside of the household</i> |                                   |                                                    |                                     |                                                            |                                   |
| <i>Full sample model</i>                                                                                | .178<br>[-.289 - .644]<br>10,929                                                                 | -.537<br>[-1.59 - .513]<br>10,929 | -.030<br>[-.524 - .464]<br>11,236                  | -.593<br>[-1.71 - .520]<br>11,236   | .291<br>[-.191 - .774]<br>11,276                           | -.447<br>[-1.53 - .640]<br>11,276 |
| <i>Males only</i>                                                                                       | -.068<br>[-.698 - .562]<br>5,340                                                                 | -.156<br>[-1.45 - 1.14]<br>5,340  | -.175<br>[-.878 - .529]<br>5,490                   | -1.54**<br>[-2.99 - -.097]<br>5,490 | .094<br>[-.609 - .796]<br>5,518                            | -.895<br>[-2.34 - .549]<br>5,518  |
| <i>Females only</i>                                                                                     | .524<br>[-.302 - 1.35]<br>5,268                                                                  | -1.33<br>[-3.25 - .590]<br>5,268  | .140<br>[-.699 - .978]<br>5,398                    | 1.02<br>[-.923 - 2.97]<br>5,398     | .825**<br>[.022 - 1.63]<br>5,409                           | .080<br>[-1.78 - 1.94]<br>5,409   |
| <i>Living alone* Out of education and employment</i>                                                    |                                                                                                  |                                   |                                                    |                                     |                                                            |                                   |
| <i>Full sample model</i>                                                                                | .046<br>[-.174 - .266]<br>11,802                                                                 | -.206<br>[-.676 - .265]<br>11,802 | -.128<br>[-.362 - .107]<br>12,109                  | .231<br>[-.270 - .731]<br>12,109    | -.231***<br>[-.455 - -.007]<br>12,155                      | .319<br>[-.163 - .801]<br>12,155  |
| <i>Males only</i>                                                                                       | .013<br>[-.274 - .300]<br>5,820                                                                  | -.399<br>[-1.26 - .477]<br>5,820  | -.099<br>[-.423 - .225]<br>5,970                   | 1.43***<br>[.447 - 2.42]<br>5,970   | -.097<br>[-.410 - .216]<br>5,998                           | -.057<br>[-1.04 - .920]<br>5,998  |
| <i>Females only</i>                                                                                     | .041<br>[-.309 - .391]<br>5,661                                                                  | -.145<br>[-.850 - .559]<br>5,661  | -.143<br>[-.499 - .213]<br>5,791                   | -.264<br>[-.980 - .453]<br>5,791    | -.279<br>[-.617 - .059]<br>5,808                           | .652*<br>[-.028 - 1.33]<br>5,808  |
| <i>Living alone* Lack of community engagement</i>                                                       |                                                                                                  |                                   |                                                    |                                     |                                                            |                                   |

|                                                                                                                     |                                   |                                   |                                   |                                   |                                   |                                     |
|---------------------------------------------------------------------------------------------------------------------|-----------------------------------|-----------------------------------|-----------------------------------|-----------------------------------|-----------------------------------|-------------------------------------|
| <i>Full sample model</i>                                                                                            | -.082<br>[-.210 - .047]<br>11,283 | .036<br>[-.225 - .298]<br>11,283  | .036<br>[-.102 - .174]<br>11,359  | -.009<br>[-.290 - .271]<br>11,359 | .006<br>[-.127 - .139]<br>11,398  | -.075<br>[-.346 - .196]<br>11,398   |
| <i>Males only</i>                                                                                                   | .018<br>[-.148 - .184]<br>5,561   | .187<br>[-.150 - .523]<br>5,561   | -.036<br>[-.226 - .153]<br>5,593  | -.173<br>[-.557 - .211]<br>5,593  | -.023<br>[-.210 - .165]<br>5,618  | -.383**<br>[-.763 - -.003]<br>5,618 |
| <i>Females only</i>                                                                                                 | -.154<br>[-.358 - .051]<br>5,439  | -.129<br>[-.555 - .297]<br>5,439  | .122<br>[-.087 - .330]<br>5,480   | .109<br>[-.326 - .543]<br>5,480   | .087<br>[-.111 - .285]<br>5,494   | .192<br>[-.221 - .605]<br>5,494     |
| <i>Lack of regular contact with friends and relatives outside of the household* Out of education and employment</i> |                                   |                                   |                                   |                                   |                                   |                                     |
| <i>Full sample model</i>                                                                                            | -.271<br>[-.739 - .197]<br>10,931 | .509<br>[-.694 - 1.71]<br>10,931  | .138<br>[-.359 - .635]<br>11,238  | .123<br>[-1.15 - 1.40]<br>11,238  | .473*<br>[-.011 - .956]<br>11,278 | -.854<br>[-2.10 - .389]<br>11,278   |
| <i>Males only</i>                                                                                                   | .211<br>[-.496 - .917]<br>5,343   | -.354<br>[-1.78 - 1.07]<br>5,343  | .269<br>[-.523 - 1.06]<br>5,493   | .180<br>[-1.41 - 1.77]<br>5,493   | .410<br>[-.377 - 1.20]<br>5,521   | -.915<br>[-2.50 - .669]<br>5,521    |
| <i>Females only</i>                                                                                                 | -.320<br>[-1.01 - .366]<br>5,267  | -                                 | .159<br>[-.539 - .857]<br>5,397   | -                                 | .547<br>[-.118 - 1.21]<br>5,408   | -                                   |
| <i>Lack of regular contact with friends and relatives outside of the household* Lack of community engagement</i>    |                                   |                                   |                                   |                                   |                                   |                                     |
| <i>Full sample model</i>                                                                                            | .197<br>[-.137 - .531]<br>10,419  | -.627<br>[-1.76 - .505]<br>10,419 | .312*<br>[-.043 - .667]<br>10,495 | .097<br>[-1.11 - 1.30]<br>10,495  | -.214<br>[-.559 - .132]<br>10,528 | .713<br>[-.461 - 1.89]<br>10,528    |
| <i>Males only</i>                                                                                                   | .319<br>[-.100 - .739]<br>5,088   | -.446<br>[-1.90 - 1.00]<br>5,088  | .310<br>[-.163 - .782]<br>5,120   | .079<br>[-1.56 - 1.72]<br>5,120   | -.130<br>[-.599 - .340]<br>5,145  | .938<br>[-.690 - 2.57]<br>5,145     |
| <i>Females only</i>                                                                                                 | .078<br>[-.450 - .606]<br>5,048   | -.846<br>[-2.59 - .901]<br>5,048  | .355<br>[-.181 - .891]<br>5,089   | -.026<br>[-1.80 - 1.75]<br>5,089  | -.284<br>[-.797 - .230]<br>5,097  | .420<br>[-1.28 - 2.12]<br>5,097     |



| <i>Out of education and employment* Lack of community engagement</i> |                                   |                                   |                                      |                                  |                                      |                                     |
|----------------------------------------------------------------------|-----------------------------------|-----------------------------------|--------------------------------------|----------------------------------|--------------------------------------|-------------------------------------|
| <i>Full sample model</i>                                             | .197**<br>[.042 - .353]<br>11,285 | -.096<br>[-.417 - .225]<br>11,285 | -.179**<br>[-.346 - -.012]<br>11,361 | .002<br>[-.342 - .345]<br>11,361 | -.206**<br>[-.368 - -.044]<br>11,400 | -.209<br>[-.542 - .124]<br>11,400   |
| <i>Males only</i>                                                    | .186<br>[-.104 - .475]<br>5,564   | -.526*<br>[-1.13 - .075]<br>5,564 | -.381**<br>[-.711 - -.051]<br>5,596  | .139<br>[-.547 - .824]<br>5,596  | -.129<br>[-.455 - .196]<br>5,621     | .421<br>[-.256 - 1.10]<br>5,621     |
| <i>Females only</i>                                                  | .199**<br>[.000 - .398]<br>5,438  | .003<br>[-.409 - .414]<br>5,438   | -.127<br>[-.330 - .076]<br>5,479     | -.023<br>[-.443 - .397]<br>5,479 | -.218**<br>[-.411 - -.025]<br>5,493  | -.400**<br>[-.799 - -.001]<br>5,493 |

Note: All models use complete case data, adjusted for the full covariate set and are run once with a cohort dummy variable and where significant, again to include a cohort interaction term (\*cohort) and for males and females only. Health outcomes are standardised, and continuous covariates centred. Coefficients are reported for social isolation indicator interactions and cohort interaction effects. Male and female samples do not = total sample due to some missing data on the sex at birth variable. - = no observations in the sample.

\*\*\*  $p < 0.01$ , \*\*  $p < 0.05$ , \*  $p < 0.1$

Table S11. Linear multivariable regression models for the interaction between multiple social isolation indicators to identify 1) the additive and multiplicative interaction effects, and 2) cohort effects in any interaction associations on psychological distress, life satisfaction and self-rated general health using impute and delete data

| All coefficients presented are for interactions between multiple social isolation indicators (exposure) | Psychological distress<br>Total sample N = 17,500<br>Males N = 8,185<br>Females N = 8,746<br>coef [95% CI]<br>p-value |                            | Life satisfaction<br>Total sample N = 18,118<br>Males N = 8,486<br>Females N = 9,008<br>coef [95% CI]<br>p-value |                         | Self-rated general health<br>Total sample N = 18,309<br>Males N = 8,600<br>Females N = 9,079<br>coef [95% CI]<br>p-value |                         |
|---------------------------------------------------------------------------------------------------------|-----------------------------------------------------------------------------------------------------------------------|----------------------------|------------------------------------------------------------------------------------------------------------------|-------------------------|--------------------------------------------------------------------------------------------------------------------------|-------------------------|
|                                                                                                         | (1)Interaction                                                                                                        | (2)*Cohort                 | (1)Interaction                                                                                                   | (2)*Cohort              | (1)Interaction                                                                                                           | (2)*Cohort              |
|                                                                                                         | <i>Living alone* Lack of regular contact with friends and relatives outside of the household</i>                      |                            |                                                                                                                  |                         |                                                                                                                          |                         |
| <i>Full sample model</i>                                                                                | .238<br>[-.123 - .600]                                                                                                | -.490<br>[-1.33 - .351]    | -.044<br>[-.409 - .320]                                                                                          | -.231<br>[-1.13 - .666] | .064<br>[-.269 - .397]                                                                                                   | -.197<br>[-1.07 - .672] |
| <i>Males only</i>                                                                                       | .154<br>[-.320 - .628]                                                                                                | -.336<br>[-1.35 - .675]    | .145<br>[-.351 - .642]                                                                                           | -.907<br>[-2.08 - .262] | -.050<br>[-.525 - .425]                                                                                                  | -.371<br>[-1.44 - .693] |
| <i>Females only</i>                                                                                     | .357<br>[-.298 - 1.01]                                                                                                | -.848<br>[-2.62 - .923]    | -.359<br>[-1.06 - .338]                                                                                          | .985<br>[-.930 - 2.90]  | .211<br>[-.332 - .755]                                                                                                   | .365<br>[-1.25 - 1.98]  |
| <i>Living alone* Out of education and employment</i>                                                    |                                                                                                                       |                            |                                                                                                                  |                         |                                                                                                                          |                         |
| <i>Full sample model</i>                                                                                | .165**<br>[.033 - .297]                                                                                               | -.288**<br>[-.544 - -.032] | -.197***<br>[-.335 - -.058]                                                                                      | .131<br>[-.146 - .408]  | -.049<br>[-.169 - .072]                                                                                                  | .123<br>[-.114 - .359]  |
| <i>Males only</i>                                                                                       | .082<br>[-.080 - .244]                                                                                                | -.311*<br>[-.641 - .019]   | -.024<br>[-.206 - .157]                                                                                          | .107<br>[-.272 - .486]  | .137<br>[-.027 - .300]                                                                                                   | .146<br>[-.178 - .471]  |
| <i>Females only</i>                                                                                     | .223**<br>[.009 - .437]                                                                                               | -.406*<br>[-.826 - .014]   | -.333***<br>[-.556 - -.111]                                                                                      | .137<br>[-.309 - .583]  | -.137<br>[-.324 - .051]                                                                                                  | .174<br>[-.196 - .544]  |
| <i>Living alone* Lack of community engagement</i>                                                       |                                                                                                                       |                            |                                                                                                                  |                         |                                                                                                                          |                         |
| <i>Full sample model</i>                                                                                | -.022<br>[-.140 - .095]                                                                                               | .023<br>[-.218 - .264]     | -.008<br>[-.130 - .113]                                                                                          | .016<br>[-.244 - .277]  | .013<br>[-.105 - .130]                                                                                                   | -.041<br>[-.275 - .194] |
| <i>Males only</i>                                                                                       | .058<br>[-.096 - .213]                                                                                                | .104<br>[-.223 - .431]     | -.081<br>[-.251 - .089]                                                                                          | -.066<br>[-.421 - .288] | .004<br>[-.157 - .165]                                                                                                   | -.174<br>[-.504 - .157] |

|                                                                                                                    |                         |                         |                         |                         |                             |                         |
|--------------------------------------------------------------------------------------------------------------------|-------------------------|-------------------------|-------------------------|-------------------------|-----------------------------|-------------------------|
| <i>Females only</i>                                                                                                | -.084<br>[-.269 - .100] | -.088<br>[-.473 - .297] | .078<br>[-.115 - .271]  | .070<br>[-.323 - .462]  | .055<br>[-.127 - .238]      | .104<br>[-.259 - .466]  |
| <i>Lack of regular contact with friends and relatives outside of the household*Out of education and employment</i> |                         |                         |                         |                         |                             |                         |
| <i>Full sample model</i>                                                                                           | .024<br>[-.251 - .299]  | .047<br>[-.603 - .697]  | .061<br>[-.221 - .343]  | .114<br>[-.544 - .773]  | .094<br>[-.146 - .333]      | .055<br>[-.550 - .660]  |
| <i>Males only</i>                                                                                                  | -.007<br>[-.432 - .419] | .146<br>[-.716 - 1.01]  | .163<br>[-.329 - .656]  | .154<br>[-.841 - 1.15]  | .300<br>[-.104 - .703]      | -.102<br>[-.925 - .722] |
| <i>Females only</i>                                                                                                | .042<br>[-.358 - .442]  | -.156<br>[-1.20 - .888] | -.017<br>[-.426 - .391] | .107<br>[-.938 - 1.15]  | .015<br>[-.326 - .355]      | .200<br>[-.763 - 1.16]  |
| <i>Lack of regular contact with friends and relatives outside of the household* Lack of community engagement</i>   |                         |                         |                         |                         |                             |                         |
| <i>Full sample model</i>                                                                                           | .127<br>[-.158 - .413]  | -.253<br>[-1.07 - .561] | .133<br>[-.174 - .440]  | -.312<br>[-1.21 - .588] | -.056<br>[-.333 - .221]     | .134<br>[-.708 - .977]  |
| <i>Males only</i>                                                                                                  | .232<br>[-.153 - .618]  | -.308<br>[-1.28 - .666] | .048<br>[-.370 - .467]  | -.413<br>[-1.53 - .708] | -.060<br>[-.449 - .328]     | .186<br>[-.853 - 1.23]  |
| <i>Females only</i>                                                                                                | .057<br>[-.358 - .473]  | -.488<br>[-2.05 - 1.08] | .195<br>[-.250 - .641]  | .075<br>[-1.55 - 1.70]  | -.044<br>[-.472 - .385]     | .038<br>[-1.51 - 1.59]  |
| <i>Out of education and employment* Lack of community engagement</i>                                               |                         |                         |                         |                         |                             |                         |
| <i>Full sample model</i>                                                                                           | .109**<br>[.010 - .208] | .060<br>[-.122 - .242]  | -.037<br>[-.140 - .067] | .027<br>[-.166 - .221]  | -.127***<br>[-.217 - -.036] | .042<br>[-.142 - .225]  |
| <i>Males only</i>                                                                                                  | .103<br>[-.087 - .294]  | .101<br>[-.269 - .470]  | -.140<br>[.358 - .078]  | -.226<br>[-.639 - .187] | .013<br>[-.183 - .209]      | .282<br>[-.103 - .666]  |
| <i>Females only</i>                                                                                                | .079<br>[-.042 - .201]  | .051<br>[-.182 - .284]  | .005<br>[-.121 - .131]  | .100<br>[-.144 - .344]  | -.144***<br>[-.251 - -.036] | -.059<br>[-.286 - .168] |

Note: All models use impute and delete data, adjusted for the full covariate set and are run once with a cohort dummy variable and where significant, again to include a cohort interaction term (\*cohort) and for males and females only. Health outcomes are standardised, and continuous covariates centred. Coefficients are reported for social isolation indicator interactions and cohort interaction effects. Male and female samples do not = total sample due to some missing data on the sex at birth variable.

\*\*\*  $p < 0.01$ , \*\*  $p < 0.05$ , \*  $p < 0.1$

Table S12. Results from the latent class analyses (1-5 classes) including goodness-of-fit statistics (full sample with 1970 BCS and 1958 cohorts combined N=19,902)

| Class solution | BIC       | ABIC      | AIC       | Entropy | Average latent posterior probabilities (>.90) yes/no | Vuong-Lo-Mendell-Rubin adjusted likelihood ratio test (p-value) | Any classes with less than 5% of the sample yes/no |
|----------------|-----------|-----------|-----------|---------|------------------------------------------------------|-----------------------------------------------------------------|----------------------------------------------------|
| 1              | 48779.359 | 48766.647 | 48747.764 | -       | -                                                    | -                                                               | -                                                  |
| 2              | 48719.095 | 48690.493 | 48648.008 | .985    | yes                                                  | .000                                                            | no                                                 |
| 3              | 48732.183 | 48687.692 | 48621.603 | .932    | no                                                   | .000                                                            | yes                                                |
| 4              | 48776.514 | 48716.133 | 48626.441 | .836    | no                                                   | .108                                                            | yes                                                |
| 5              | 48823.570 | 48747.299 | 48634.004 | .462    | no                                                   | .732                                                            | yes                                                |

Note: BIC = Bayesian information criteria, ABIC = adjusted Bayesian information criteria, AIC = Akaike information criterion. Sample based on FIML approach in Mplus

Table S13. Class membership (N(%)) for full sample and by sex and cohort

| Class                                                                                                          | Full sample<br>N=19,902 | Males<br>N= 8,371 | Females<br>N=9,083 | 1970 BCS<br>N=9,802 | 1958 NCDS<br>N=10,100 |
|----------------------------------------------------------------------------------------------------------------|-------------------------|-------------------|--------------------|---------------------|-----------------------|
| 1 – living alone and lacking community engagement                                                              | 393(1.97)               | 156(1.86)         | 111(1.22)          | 223(2.28)           | 170(1.68)             |
| 2 – lack of frequent contact with friends and relatives outside the household and lacking community engagement | 392(1.97)               | 170(2.03)         | 124(1.37)          | 317(3.23)           | 75(0.74)              |
| 3 – low isolation except lack of community engagement                                                          | 19,117(96.06)           | 8,045(96.11)      | 8,848(97.41)       | 9,262(94.49)        | 9,855(97.57)          |

Note: sample based on FIML approach in Mplus and complete case sex
